# Supplementary material
Source: Springer Nature journal article supplement (https://www.springermedizin.de/resource/supplementary/12955_2013_1262_MOESM5_ESM.pdf/9559554)

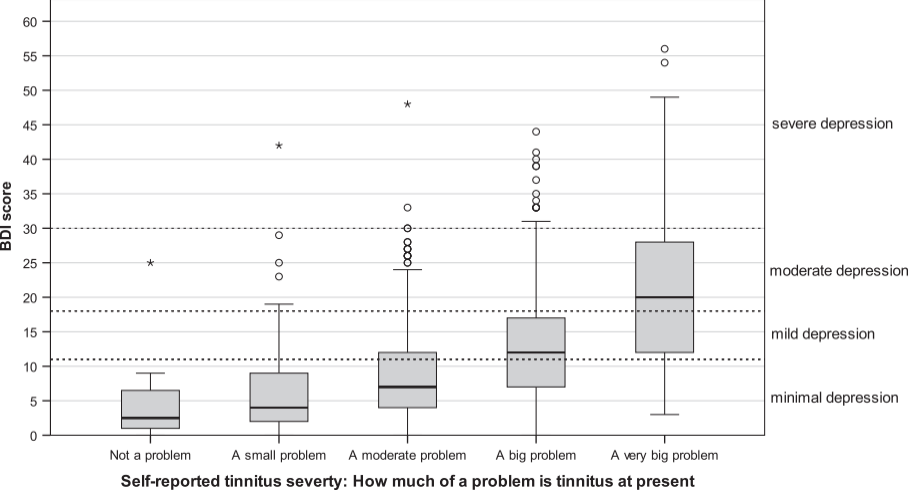

Supplement: MOESM5 [file 9559554]
